# Supplementary material for: Compositional Consequences of Partial Dealcoholization of Red Wine by Reverse Osmosis-Evaporative Perstraction
Source: PubMed Central journal article supplement (PMC6480466; doi:10.3390/molecules24071404), 2019-04-10
Supplement: molecules-24-01404-s001.pdf [file molecules-24-01404-s001.pdf]

**Table S1.** Deuterated internal standards used for determination of fermentation volatiles by GC-MS.

| Analyte                  | RT (min) | Ions <sup>1</sup> (m/z) | Internal standard                         |
|--------------------------|----------|-------------------------|-------------------------------------------|
| ethyl acetate            | 6.783    | <b>61</b> , 70, 88      | d <sub>8</sub> -ethyl acetate             |
| ethyl propanoate         | 8.492    | 75, 80, <b>102</b>      | d <sub>5</sub> -ethyl propanoate          |
| ethyl 2-methylpropanoate | 8.712    | 88,101, <b>116</b>      | d <sub>5</sub> -ethyl 2-methyl propanoate |
| 2-methylpropyl acetate   | 10.107   | <b>56</b> , 73, 86      | d <sub>9</sub> -2-methylpropyl acetate    |
| ethyl butanoate          | 10.870   | 71, 88, <b>101</b>      | d <sub>5</sub> -ethyl butanoate           |
| ethyl 2-methylbutanoate  | 11.375   | 85, <b>102</b> , 115    | d <sub>5</sub> -ethyl 2-methyl butanoate  |
| ethyl 3-methylbutanoate  | 11.872   | 85, <b>88</b> , 115     | d <sub>5</sub> -ethyl 2-methyl butanoate  |
| 2-methyl-1-propanol      | 12.781   | 41, <b>43</b> , 74      | d <sub>9</sub> -2-methyl-1-propanol       |
| 2-methylbutyl acetate    | 13.681   | 57, 72, <b>74</b>       | d <sub>9</sub> -3-methylbutyl acetate     |
| 3-methylbutyl acetate    | 13.718   | 55, 87, <b>88</b>       | d <sub>9</sub> -3-methylbutyl acetate     |
| 1-butanol                | 14.473   | 41, 44, <b>56</b>       | d <sub>10</sub> -1-butanol                |
| 2-methyl-1-butanol       | 16.522   | 41, 56, <b>70</b>       | d <sub>9</sub> -3-methyl-1-butanol        |
| 3-methyl-1-butanol       | 16.522   | 55, 60, <b>70</b>       | d <sub>9</sub> -3-methyl-1-butanol        |
| ethyl hexanoate          | 17.419   | <b>88</b> , 99, 115     | d <sub>5</sub> -ethyl hexanoate           |
| hexyl acetate            | 18.692   | 69, 73, <b>84</b>       | d <sub>13</sub> -hexyl acetate            |
| hexanol                  | 21.018   | 55, <b>56</b> , 69      | d <sub>13</sub> -hexanol                  |
| ethyl octanoate          | 23.441   | 88, <b>101</b> , 127    | d <sub>5</sub> -ethyl octanoate           |
| acetic acid              | 24.058   | 43, <b>60</b>           | d <sub>3</sub> -acetic acid               |
| propanoic acid           | 26.283   | 57, 73, <b>74</b>       | d <sub>5</sub> -propanoic acid            |
| 2-methylpropanoic acid   | 26.979   | 43, <b>73</b> , 88      | d <sub>7</sub> -2-methylpropanoic acid    |
| butanoic acid            | 28.553   | 45, <b>60</b> , 73      | d <sub>7</sub> -butanoic acid             |
| ethyl decanoate          | 28.811   | 101, 157, <b>200</b>    | d <sub>5</sub> -ethyl decanoate           |
| 3-methylbutanoic acid    | 29.686   | <b>60</b> , 61          | d <sub>7</sub> -3-methylbutanoic acid     |
| 2-methylbutanoic acid    | 29.704   | 57, <b>74</b>           | d <sub>7</sub> -3-methylbutanoic acid     |
| 2-phenylethyl acetate    | 33.010   | 65, 91, <b>104</b>      | d <sub>3</sub> -2-phenylethyl acetate     |
| hexanoic acid            | 33.435   | <b>60</b> , 73, 87      | d <sub>11</sub> -hexanoic acid            |
| 2-phenylethanol          | 34.667   | <b>91</b> , 92, 122     | d <sub>3</sub> -2-phenylethanol           |
| octanoic acid            | 36.641   | 60, 85, <b>115</b>      | d <sub>15</sub> -octanoic acid            |
| decanoic acid            | 39.304   | 73, <b>129</b> , 172    | d <sub>19</sub> -decanoic acid            |

<sup>1</sup> The bolded ion was used for quantification.
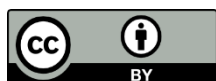

© 2019 by the authors. Submitted for possible open access publication under the terms and conditions of the Creative Commons Attribution (CC BY) license (<http://creativecommons.org/licenses/by/4.0/>).
